# Supplementary material
Source: PubMed Central journal article supplement (PMC1283415)

**CagA fragments, their localization and effect on MDCK or AGS cell morphology (E = elongated).**

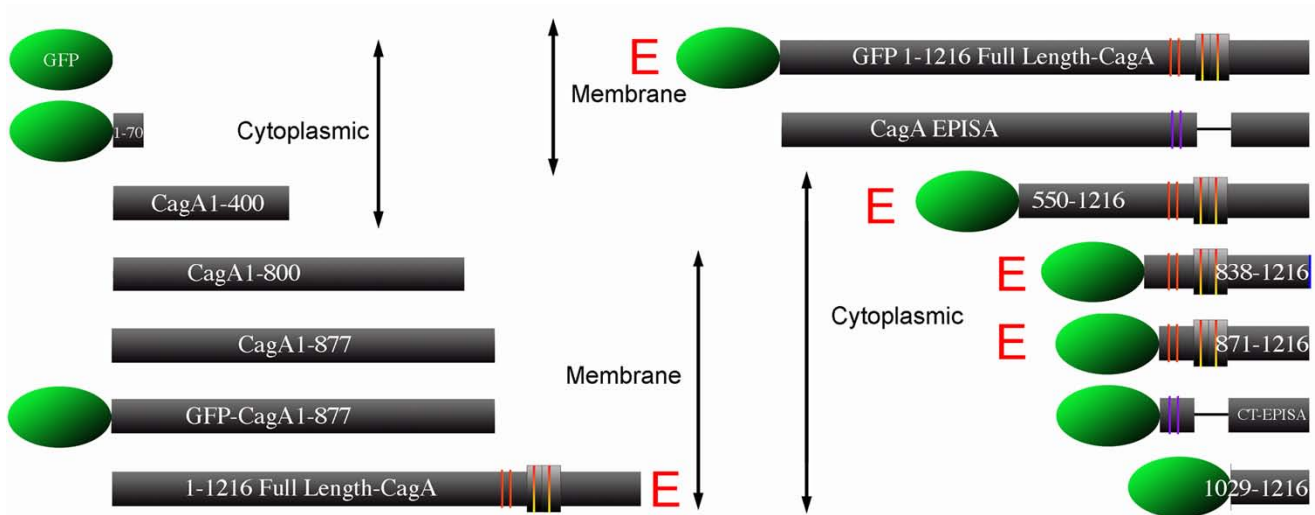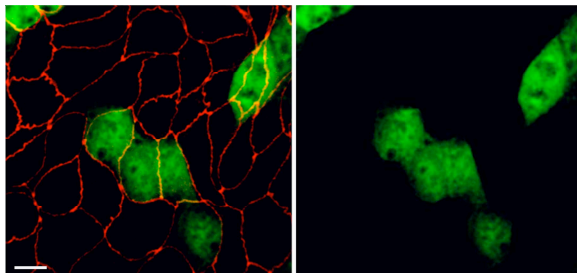

**Construct:** GFP  
**Vector:** EGFP N3- Clontech  
**Localization:** Diffuse, cytoplasmic  
**Cell Type:** MDCK  
**Cell Morphology:** Normal  
**Visualization:** GFP fluorescence  
**Notes:** GFP also diffuses into the nucleus

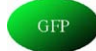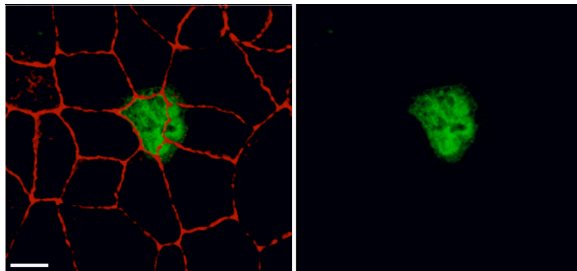

**Construct:** GFP-CagA1-70  
**Vector:** EGFP N3- Clontech  
**Localization:** Diffuse, cytoplasmic  
**Cell Type:** MDCK  
**Cell Morphology:** Normal  
**Visualization:** GFP fluorescence  
**Notes:** The N-terminal 70aa fragment does not have a localization domain

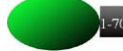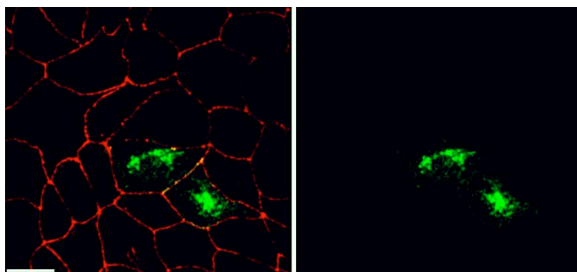

**Construct:** CagA1-400  
**Vector:** pCI - Promega  
**Localization:** Cytoplasmic near the nucleus  
**Cell Type:** MDCK  
**Cell Morphology:** Normal  
**Visualization:** anti-CagA antibodies  
**Notes:** Recognized by anti-CagA antibodies

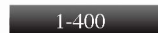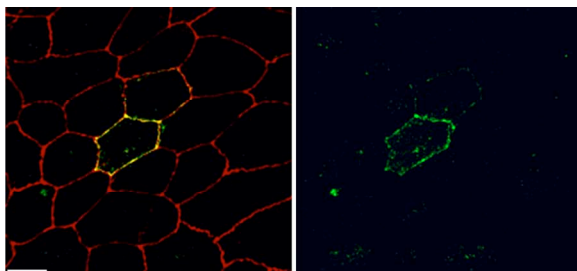

**Construct:** CagA1-800  
**Vector:** pIRES- Clontech  
**Localization:** Peripheral near the plasma membrane with enhancement at the intercellular junctions  
**Cell Type:** MDCK  
**Cell Morphology:** Normal  
**Visualization:** anti-CagA antibodies  
**Notes:** Smaller than the NT-CagA fragment studied in the manuscript, yet it contains the membrane localization information.

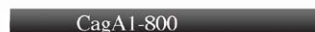

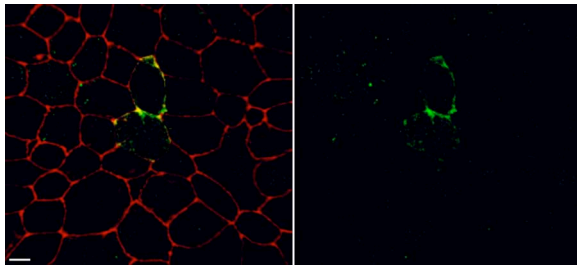

**Construct:** CagA1-877 or NT-CagA

**Vector:** pIRES- Clontech

**Localization:** Peripheral near the plasma membrane with enhancement at the intercellular junctions

**Cell Type:** MDCK

**Cell Morphology:** Normal

**Visualization:** anti-CagA antibodies

**Notes:** NT-CagA has the same localization whether visualized by antibodies or through the GFP tag. See Fig. 4.

CagA1-877

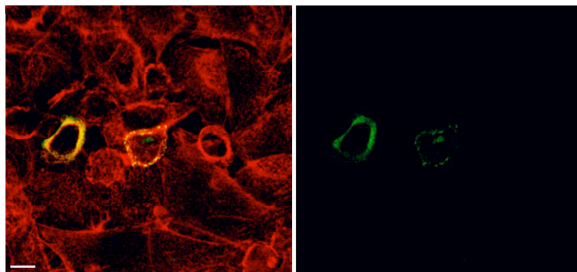

**Construct:** GFP-CagA1-877 or GFP-NT-CagA

**Vector:** EGFP C3- Clontech

**Localization:** Peripheral near the plasma membrane

**Cell Type:** AGS

**Cell Morphology:** Normal

**Visualization:** GFP fluorescence

**Notes:** The NT-CagA fragment localizes near the membrane in unpolarized AGS cells.

GFP-CagA1-877

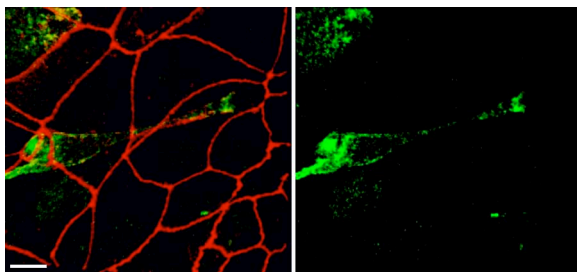

**Construct:** CagA1-1216 or Full Length CagA

**Vector:** pIRES- Clontech

**Localization:** Peripheral near the plasma membrane with enhancement at the intercellular junctions. Causes junction disruption

**Cell Type:** MDCK

**Cell Morphology:** Elongated. Loss of polarity

**Visualization:** anti-CagA antibodies

**Notes:** The GFP tagged version described in the manuscript has identical properties.

1-1216 Full Length-CagA

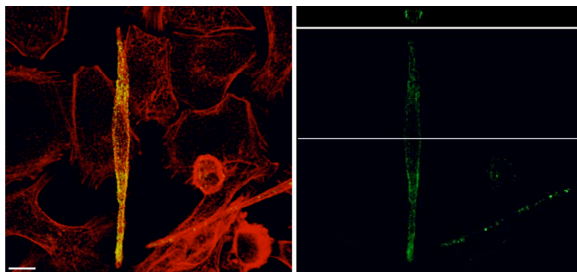

**Construct:** GFP-CagA1-1216 or Full Length GFP-CagA

**Vector:** EGFP C3- Clontech

**Localization:** Peripheral near the plasma membrane.

**Cell Type:** AGS

**Cell Morphology:** Elongated

**Visualization:** GFP fluorescence

**Notes:** This is the same construct used in the manuscript but expressed in AGS cells. The cross section visualizes the protein near the membrane. Compare to GFP-CT-CagA.

GFP 1-1216 Full Length-CagA

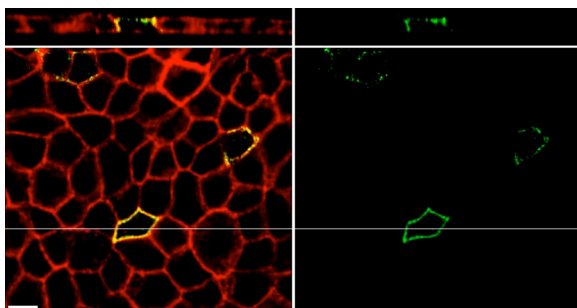

**Construct:** CagAEPISA

**Vector:** pIRES-Clontech

**Localization:** Peripheral near the plasma membrane with enhancement at the intercellular junctions.

**Cell Type:** MDCK

**Cell Morphology:** Normal

**Visualization:** anti-CagA antibodies

**Notes:** This construct lacks the last two EPIYA repeats and in the first two, the tyrosines have been replaced by serine. The protein is not tyrosine phosphorylated. Cross sections at the top. This monolayer is counterstained with phalloidin.

CagA EPISA

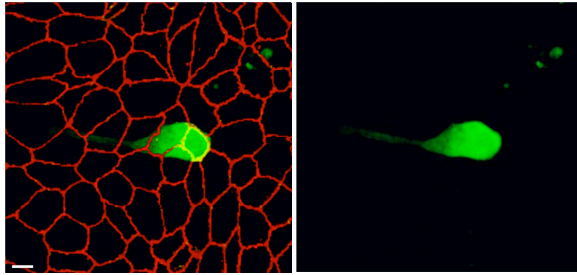

**Construct:** GFP-CagA550-1216  
**Vector:** pIRES- Clontech  
**Localization:** Diffuse throughout the cell cytoplasm.  
**Cell Type:** MDCK  
**Cell Morphology:** elongated  
**Visualization:** GFP fluorescence  
**Notes:** Larger construct than CT-CagA. It causes the same phenotypes as GFP-CT-CagA

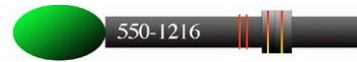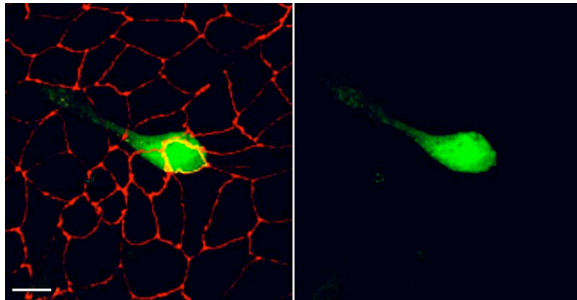

**Construct:** CT-CagA838-1216-FLAG  
**Vector:** EGFP C3- Clontech  
**Localization:** Diffuse throughout the cell cytoplasm.  
**Cell Type:** MDCK  
**Cell Morphology:** elongated  
**Visualization:** GFP fluorescence  
**Notes:** This construct behaves like the CT-CagA fragment and also has a C-terminal FLAG tag for immunoprecipitation.

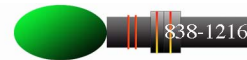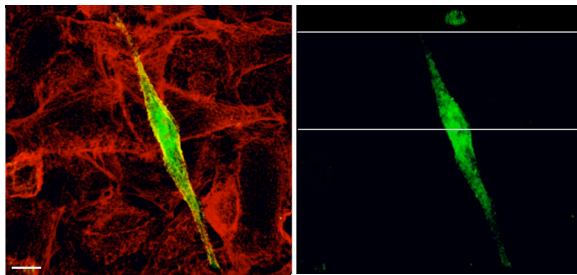

**Construct:** GFP-CagA871-1216 or GFP-CT-CagA  
**Vector:** pIRES - Clontech  
**Localization:** Diffuse throughout the cell cytoplasm.  
**Cell Type:** AGS  
**Cell Morphology:** elongated  
**Visualization:** GFP fluorescence  
**Notes:** CT-CagA expressed in AGS cells causes elongation. Cross section shown at top of GFP image shows cytosolic distribution.

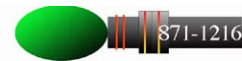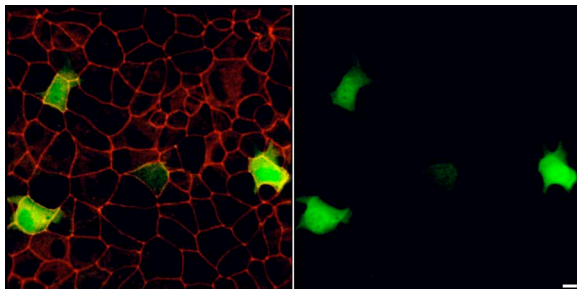

**Construct:** GFP-CT-EPISA  
**Vector:** pIRES- Clontech  
**Localization:** Diffuse throughout the cell cytoplasm.  
**Cell Type:** MDCK  
**Cell Morphology:** Normal  
**Visualization:** GFP fluorescence  
**Notes:** Based on CT-CagA, it lacks the last two EPIYA repeats and has the tyrosines mutated to serine in the first two EPIYA motifs.

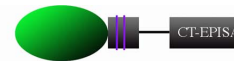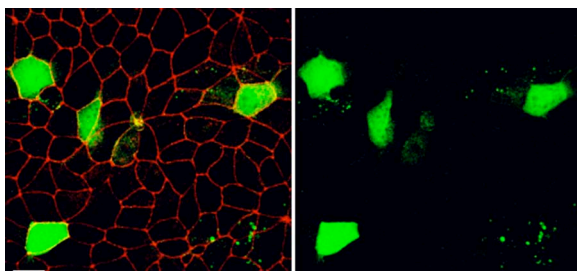

**Construct:** GFP-CagA1029-1216  
**Vector:** pIRES- Clontech  
**Localization:** Diffuse throughout the cell cytoplasm.  
**Cell Type:** MDCK  
**Cell Morphology:** Normal  
**Visualization:** GFP fluorescence  
**Notes:** This construct lacks all the EPIYA motifs.

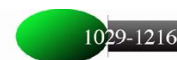

Supplement: pnas_0502598102_1.pdf [file pnas_0502598102_1.pdf]
